# Supplementary material
Source: HighWire-hosted journal article supplement (https://www.jneurosci.org/content/38/39/8329)
Supplement: inline-supplementary-material-6 [file inline-supplementary-material-6.xlsx]

## Sheet: extended table 6-1
Fig. 6C optical intensity of Microglial C1q
Ctrl		PTx3		PTx10		PTx10+mino
ipsi	contra	ipsi	contra	ipsi	contra	ipsi	contra
4.81246	11.7519	70.167	51.34	25.6633	37.136	6.87485	35.1921
87.4049	6.14117	7.989	36.265	38.0146	34.5066	6.35996	3.50853
29.2472	9.21832	49.88	118.937	117.206	35.4889	9.84596	6.809
6.4855	6.1825	60.65	38.002	45.4077	12.1805	5.33649	18.9278
28.8552	18.8376	39.391	57.245	41.4753	53.5171	33.9386	12.3962
3.3135	11.0344	67.041	22.023	53.0082	109.064	2.91024	11.4688
4.64163	19.3974	9.657	23.482	56.401	32.8233	3.6321	25.5816
14.1082	35.1069	33.694	22.648	22.1213	35.4072	29.2416	41.3153
16.5722	70.0081	34.667	15.145	93.7782	62.3922	10.7984	30.9703
5.34372	20.5623	41.891	54.675	34.1637	55.8035	11.0007	19.3728
29.4953	28.3717	18.34	6.322	27.7242	108.766	12.2716	17.3868
3.9595	33.2178	6.461	43.212	37.3348	86.1668	10.232	7.44541
5.72745	10.7778	11.393	30.984	126.806	69.5286	6.15473	13.8402
3.42735	16.1448	31.124	45.643	59.1309	31.5912	9.4669	10.9301
34.2902	10.6557	62.733	64.401	29.6069	136.316	4.14737	48.6388
19.1456	18.9996	23.482	56.412	54.7027	229.004	46.8389	38.4111
39.5817	33.4687	21.189	20.634	46.573	151.281	25.3573	40.2842
15.9103	65.9423		7.364	17.2912	115.324	14.7958	69.1387
5.558	22.0842		47.797	27.6355	27.1528	38.5279	28.8746
22.093	4.75797		74.266	90.028	21.5086	28.3418	21.9673
32.513	17.646		24.176	14.4831	37.6784	19.73	120.257
7.156	14.728		25.01	3.19133	73.841	12.505	19.8
48.631	11.81		21.814	64.5059	60.342	9.865	21.259
15.909	25.635		27.302	21.123	60.2119	48.909	16.743
5.071	15.562		16.673	186.151	107.387	16.257	26.122
8.476			20.008	73.4825	91.4136	38.905	50.645
8.198			8.267	58.1584	34.3174	32.166	33.277
			87.327	58.0324	64.4946	22.926	40.85
				127.829	78.6145	19.452	50.159
				113.111	137.449	5.21	70.445
				24.3313	32.2959	58.496	31.958
				16.8003	62.4892	33.555	27.025
				20.1468	160.259	68.57	18.897
				20.9464	105.103	49.604	56.759
				56.7644	121.364	75.725	3.474
				81.7237	23.8636	70.028	44.254
				75.9682	13.8043	39.391	25.635
				67.0996	43.828	20.355	36.89
				55.7443	144.199	72.876	34.805
				64.2829	23.1243	33.208	7.989
				18.5398	21.7539	13.269	9.24
				14.8027	123.524	13.061	29.734
				14.1514	79.4282		42.1
				33.805	43.4269		12.922
				3.057	50.4429		8.615
				23.343	43.3198		15.84
				38.418	99.2314		41.336
				41.406	49.2714		5.002
				58.705	102.733		10.629
				3.057	51.8225
				42.656	74.197
				24.871	61.345
				36.89	67.666
				29.803	11.532
				33.069	14.381
					37.585
					16.674
					7.503
					3.821
